# Supplementary material for: Polymerized phosphonium-based ionic liquids as gas chromatography stationary phases
Source: Royal Society of Chemistry journal article supplement (doi:10.1039/c3ra43782e), 2013-01-01
Supplement: c3ra43782e.pdf [file c3ra43782e.pdf]

# Polymerized phosphonium-based ionic liquids as gas chromatography stationary phases

## SUPPORTING INFORMATION

*Jaime González-Álvarez,<sup>a,\*</sup> Pilar Arias-Abrodo,<sup>a</sup> Marcos Puerto,<sup>b</sup> Maialen Espinal-Viguri,<sup>b</sup> Julio Pérez,<sup>b</sup> María Dolores Gutiérrez-Álvarez<sup>a,\*</sup>*

<sup>a</sup> Department of Physical and Analytical Chemistry. University of Oviedo. C/ Julián Clavería 8, 33006 Oviedo (Spain).

<sup>b</sup> Department of Organic and Inorganic Chemistry, University of Oviedo. C/ Julián Clavería 8, 33006 Oviedo (Spain).

E-mail: [loly@uniovi.es](mailto:loly@uniovi.es)

Phone number: +34 985 103473; Fax number: +34 985 103125

E-mail: [gonzalezalvarezjaime@gmail.com](mailto:gonzalezalvarezjaime@gmail.com)

Phone number: +34 985 103489; Fax number: +34 985 103125

### (Table of Contents)

|                                                                                                                                               |     |
|-----------------------------------------------------------------------------------------------------------------------------------------------|-----|
| 1. Synthesis of polymerizable phosphonium-based ionic liquids.....                                                                            | S2  |
| 2. Preparation of polymeric phosphonium-based ILs capillary columns.....                                                                      | S4  |
| 3. Probe molecules and values of solute descriptors used in the characterization of phosphonium PILs.....                                     | S5  |
| 4. Regression parameter coefficients of phosphonium PILS.                                                                                     |     |
| 5. Preparation of polymeric phosphonium-based ILs/ graphene oxide sheets capillary columns.....                                               | S7  |
| 6. Labeling scheme for $\text{BAR}'_4$ and phosphonium salts.....                                                                             | S8  |
| 7. NMR spectra ( $^1\text{H}$ -NMR, $^{31}\text{P}$ -NMR $\{^1\text{H}\}$ , $^{13}\text{C}$ -NMR $\{^1\text{H}\}$ ) of phosphonium salts..... | S9  |
| 8. HRMS data of phosphonium salts.....                                                                                                        | S24 |
| 9. References.....                                                                                                                            | S25 |

### **Synthesis of polymerizable phosphonium-based ionic liquids (ILs 1-4).**

Some manipulations were performed under an inert atmosphere of dinitrogen using standard Schlenk techniques due to the air sensitivity of n-tributylphosphine. Dichloromethane was distilled over calcium hydride under dinitrogen to remove traces of water. Chemicals were purchased from commercial sources and used without further purification.  $^1\text{H}$ ,  $^{31}\text{P}$  and  $^{13}\text{C}$  NMR spectra were recorded on Bruker Avance 400 and DPX 300 spectrometers.

#### **Synthesis of [( $^n\text{Bu}$ ) $_3$ (allyl)P]Br (IL 1).**

Manipulations were carried out using Schlenk techniques under a dinitrogen atmosphere due to the air sensitivity of n-tributylphosphine. Allyl bromide (0.83 mL, 9.60 mmol) was added to a solution of n-tributylphosphine (2 mL, 8.00 mmol) in dichloromethane (20 mL), previously cooled to 0° C. The reaction mixture was allowed to reach room temperature and stirred for 1 hour. The resulting solution was evaporated to dryness, and after approx 6 h. under vacuum IL 1 was obtained as a white solid (2.379 gr, 92%).<sup>1</sup>

#### **Synthesis of [( $^n\text{Bu}$ ) $_3$ (crotyl)P]NTf $_2$ (IL 2).**

Crotyl chloride (0.94 mL, 9.60 mmol) was added to a solution of n-tributylphosphine (2 mL, 8.00 mmol) in  $\text{CH}_2\text{Cl}_2$  at 0° C. The mixture was allowed to warm to room temperature, stirred for 1 hour and then the solvent was evaporated to dryness under reduced pressure. The residue was dissolved in methanol (20 mL), lithium bis(trifluoromethane)sulfonamide (2.756 g, 9.60 mmol) was added and the reaction mixture was stirred for 48 h. The solvent was then evaporated under vacuum, the residue extracted with  $\text{CH}_2\text{Cl}_2$  (20 mL) and the organic layer was washed with distilled

water (3 × 20 mL). Dichloromethane was evaporated and IL 2 was obtained as colorless oil (2.709 g, 63 %).

#### **Synthesis of [(<sup>n</sup>Bu)<sub>3</sub>(allyl)P][BAr'<sub>4</sub>] (IL 3).**

Compound IL 3 was obtained through a metathesis reaction between IL 1 and sodium tetrakis(3,5-bis(trifluoromethyl)phenyl)borate (NaBAr'<sub>4</sub>).<sup>2</sup>

In a Schlenk flask, 100 mg of IL 1 (0.31 mmol) were dissolved in 20 mL of dichloromethane, NaBAr'<sub>4</sub> (330 mg, 0.37 mmol) was added, and the reaction mixture was stirred for 48 hours. Then the mixture was filtered through diatomaceous earth, and the resulting colorless solution was evaporated to dryness and the white residue dried under vacuum for 6 hours. IL3 was obtained as a white solid (343 mg, 70 %. m.p 75°).

#### **Synthesis of [(Ph)<sub>2</sub>(allyl)<sub>2</sub>P]NTf<sub>2</sub> (IL 4).**

IL 4 was prepared as described above for IL2, starting from allyldiphenylphosphine (1.90 mL, 8.00 mmol), allyl bromide (0.83 mL, 9.60 mmol) and LiNTf<sub>2</sub> (2.756 g, 9.60 mmol). IL 4 was obtained as colorless oil (2.891 g, 66 %).

### **Preparation of polymeric phosphonium-based ILs capillary columns.**

All capillary columns were coated using the static method on a 30 m capillary column (0.25 mm i.d.) at 40 °C using 0.30% (w/v) of ILs dissolved in dichloromethane. Prior to adding the solvent to the monomer, 3 mg of AIBN [2,2'-azobis(2-methylpropionitrile)] (~10 wt %) were added as initiator of the radical polymerization. Capillaries were filled with the solution of the initiator and the ionic liquid. The AIBN decomposition constant was lower in comparison with the coating rate at this temperature so polymerization was almost insignificant during the filling of the column<sup>3</sup>. After coating, the ends of the capillary were sealed and the capillaries placed in a GC oven and heated from 40 to 80 °C at 1 °C/min and kept at 80 °C for 5 h in order to ensure complete polymerization. Equation 2 was used to approximate the stationary phase film thickness ( $d_f$ ) of capillaries columns.<sup>4</sup>

#### **Equation 2.**

$$d_f = d_c c / 400$$

where  $d_c$  is the diameter of the capillary tubing (in micrometers), and  $c$  is the percentage by weight (%) concentration of the stationary phase dissolved in an appropriate solvent.

In all cases, optimum film thickness was found to be 0.16 microns that corresponds to 0.25% w/v of IL.

**Table S1.** Probe molecules and values of solute descriptors used in the characterization of phosphonium PILs.

| Probe molecules     | E     | S     | A     | B     | L     |
|---------------------|-------|-------|-------|-------|-------|
| 1-Hexanol           | 0.21  | 0.44  | 0.344 | 0.52  | 3.643 |
| Anisole             | 0.712 | 0.768 | 0     | 0.311 | 3.808 |
| Cyclohexanone       | 0.403 | 0.895 | 0     | 0.53  | 3.759 |
| 1,2-Dichlorobenzene | 0.872 | 0.771 | 0     | 0.054 | 4.516 |
| Butylbenzene        | 0.595 | 0.499 | 0     | 0.139 | 4.734 |
| Nonanal             | 0.121 | 0.636 | 0     | 0.414 | 4.838 |
| Butyl acetate       | 0.079 | 0.57  | 0     | 0.438 | 3.409 |
| Iodobenzene         | 1.182 | 0.784 | 0     | 0.135 | 4.548 |
| 1-Hexyne            | 0.167 | 0.274 | 0.09  | 0.117 | 2.544 |
| 1-Nitropropane      | 0.243 | 0.925 | 0.049 | 0.27  | 2.878 |
| 1-Pentanol          | 0.219 | 0.44  | 0.344 | 0.52  | 3.128 |
| Pyridine            | 0.635 | 0.843 | 0     | 0.532 | 3.006 |
| Benzonitrile        | 0.742 | 1.135 | 0     | 0.331 | 4.04  |
| Phenyl acetate      | 0.648 | 1.055 | 0     | 0.521 | 4.378 |
| Nitrobenzene        | 0.846 | 1.138 | 0     | 0.269 | 4.539 |
| Naphthalene         | 1.24  | 0.906 | 0     | 0.193 | 5.154 |
| Heptanal            | 0.14  | 0.642 | 0     | 0.441 | 3.856 |
| 2-Heptanone         | 0.123 | 0.662 | 0     | 0.496 | 3.781 |
| 1-Phenyl ethanol    | 0.823 | 0.819 | 0.351 | 0.648 | 4.424 |
| Benzaldehyde        | 0.813 | 1.025 | 0     | 0.394 | 4.005 |
| 1-Octanol           | 0.199 | 0.44  | 0.344 | 0.52  | 4.648 |
| 1-Chloronaphthalene | 1.419 | 0.951 | 0     | 0.135 | 6.175 |
| Aniline             | 0.955 | 1.003 | 0.249 | 0.425 | 3.956 |
| Fluorene            | 1.664 | 1.12  | 0     | 0.252 | 6.921 |
| 4-Chloroaniline     | 1.017 | 1.128 | 0.366 | 0.309 | 4.972 |
| Benzyl alcohol      | 0.803 | 0.882 | 0.4   | 0.557 | 4.244 |
| Butyl benzoate      | 0.668 | 0.851 | 0     | 0.393 | 5.974 |
| Cinnamic alcohol    | 1.119 | 0.971 | 0.451 | 0.606 | 5.475 |
| Phenol              | 0.769 | 0.759 | 0.716 | 0.319 | 3.844 |
| Acetophenone        | 0.806 | 1.026 | 0     | 0.503 | 4.533 |
| 3-Methyl-1-butanol  | 0.198 | 0.423 | 0.351 | 0.501 | 2.963 |
| 1-Butanol           | 0.224 | 0.44  | 0.344 | 0.52  | 2.578 |
| Ethyl benzoate      | 0.694 | 0.886 | 0     | 0.444 | 5.032 |
| 2-Phenyl ethanol    | 0.787 | 0.797 | 0.39  | 0.636 | 4.741 |
| 1-Decanol           | 0.191 | 0.44  | 0.344 | 0.52  | 5.589 |
| Triethylamine       | 0.101 | 0.14  | 0     | 0.78  | 3.017 |
| Ethylbenzene        | 0.613 | 0.499 | 0     | 0.139 | 3.814 |
| 1,3-Dinitrobenzene  | 0.079 | 0.57  | 0     | 0.438 | 3.409 |

**Table S2.** Regression parameter coefficients of phosphonium PILS.

| IL   | T (°C) | c            | e            | s           | a           | b            | l           | R <sup>2</sup> | n  | SE   | F   |
|------|--------|--------------|--------------|-------------|-------------|--------------|-------------|----------------|----|------|-----|
| IL 1 | 50     | -4.68 (0.12) | -0.20 (0.09) | 1.83 (0.12) | 5.68 (0.19) | 0.09 (0.14)  | 0.72 (0.03) | 0.99           | 28 | 0.05 | 338 |
|      | 80     | -4.32 (0.16) | -0.23 (0.14) | 1.74 (0.16) | 4.83 (0.20) | -0.64 (0.22) | 0.59 (0.02) | 0.99           | 32 | 0.07 | 212 |
|      | 110    | -4.61 (0.15) | -0.28 (0.12) | 1.22 (0.17) | 3.60 (0.26) | -0.66 (0.29) | 0.48 (0.03) | 0.98           | 24 | 0.09 | 188 |
| IL 2 | 50     | -3.52 (0.13) | -0.20 (0.09) | 1.28 (0.12) | 0.97 (0.17) | 1.72 (0.11)  | 0.49 (0.03) | 0.98           | 32 | 0.08 | 137 |
|      | 80     | -3.85 (0.11) | -0.21 (0.07) | 1.05 (0.08) | 0.91 (0.11) | 0.97 (0.10)  | 0.42 (0.02) | 0.98           | 35 | 0.07 | 171 |
|      | 110    | -3.99 (0.12) | -0.24 (0.08) | 0.90 (0.10) | 0.88 (0.11) | 0.55 (0.14)  | 0.40 (0.03) | 0.98           | 30 | 0.07 | 116 |
| IL 3 | 50     | -3.98 (0.11) | -0.14 (0.07) | 1.57 (0.08) | 4.22 (0.14) | 1.27 (0.10)  | 0.62 (0.03) | 0.99           | 25 | 0.07 | 216 |
|      | 80     | -3.38 (0.13) | -0.28 (0.08) | 0.96 (0.12) | 3.75 (0.18) | 0.90 (0.15)  | 0.55 (0.02) | 0.98           | 26 | 0.06 | 120 |
|      | 110    | -5.33 (0.22) | -0.35 (0.16) | 0.94 (0.19) | 2.93 (0.22) | 0.29 (0.23)  | 0.41 (0.04) | 0.98           | 21 | 0.11 | 174 |
| IL 4 | 50     | -3.90 (0.20) | -0.06 (0.15) | 1.39 (0.21) | 1.42 (0.32) | 1.40 (0.26)  | 0.63 (0.04) | 0.97           | 29 | 0.12 | 91  |
|      | 80     | -4.26 (0.13) | -0.10 (0.09) | 1.33 (0.13) | 1.07 (0.16) | 1.09 (0.17)  | 0.51 (0.03) | 0.98           | 32 | 0.10 | 193 |
|      | 110    | -3.74 (0.10) | -0.43 (0.08) | 1.27 (0.12) | 0.08 (0.14) | 0.14 (0.16)  | 0.39 (0.02) | 0.98           | 30 | 0.06 | 221 |

### **Preparation of polymeric phosphonium based ILs with graphene oxide sheets capillary columns.**

The coating of the GC columns was performed using the static method. Before performing the static coating, the capillaries were pre-treated with sodium hydroxide (NaOH 1 M) and hydrochloric acid (HCl 1 M), and then purged with nitrogen for 15 min. Then, a dispersion of graphene oxide sheets in acetone was introduced in the capillary. After coating, the ends of the capillary were sealed and the capillaries were introduced in a GC oven and heated from 50 to 120 °C at 3 °C min<sup>-1</sup>. Then, the capillaries were filled with the solution of the initiator and the ionic liquid.

### Labeling scheme for $\text{BAr}'_4$ and phosphonium salts.

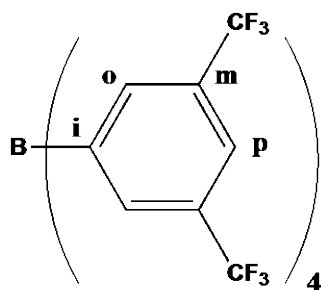

$\text{BAr}'_4$  : tetrakis-[3,5-bis(trifluoromethyl)phenyl]borate

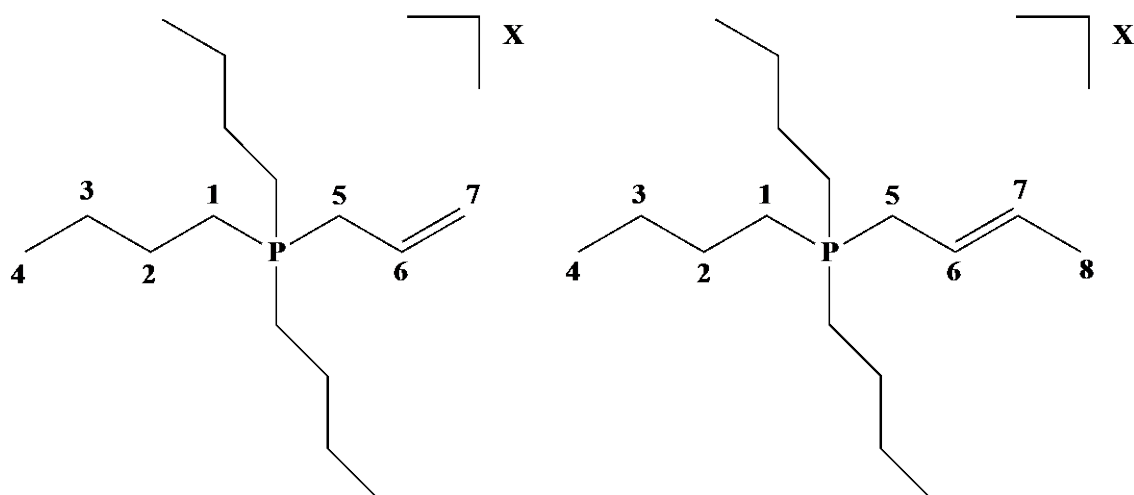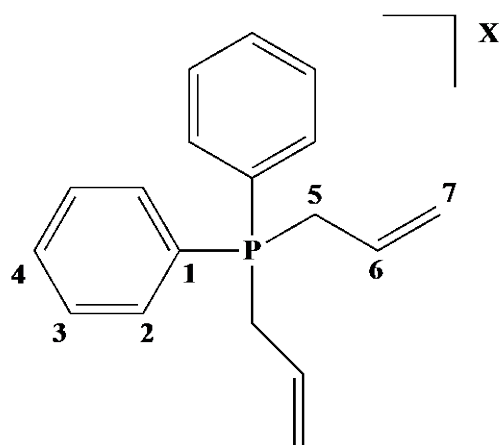



## NMR spectra ( $^1\text{H-NMR}$ , $^{31}\text{P-NMR}$ { $^1\text{H}$ }, $^{13}\text{C-NMR}$ { $^1\text{H}$ }) of phosphonium salts

IL 1 : Allyltributylphosphonium bromide.

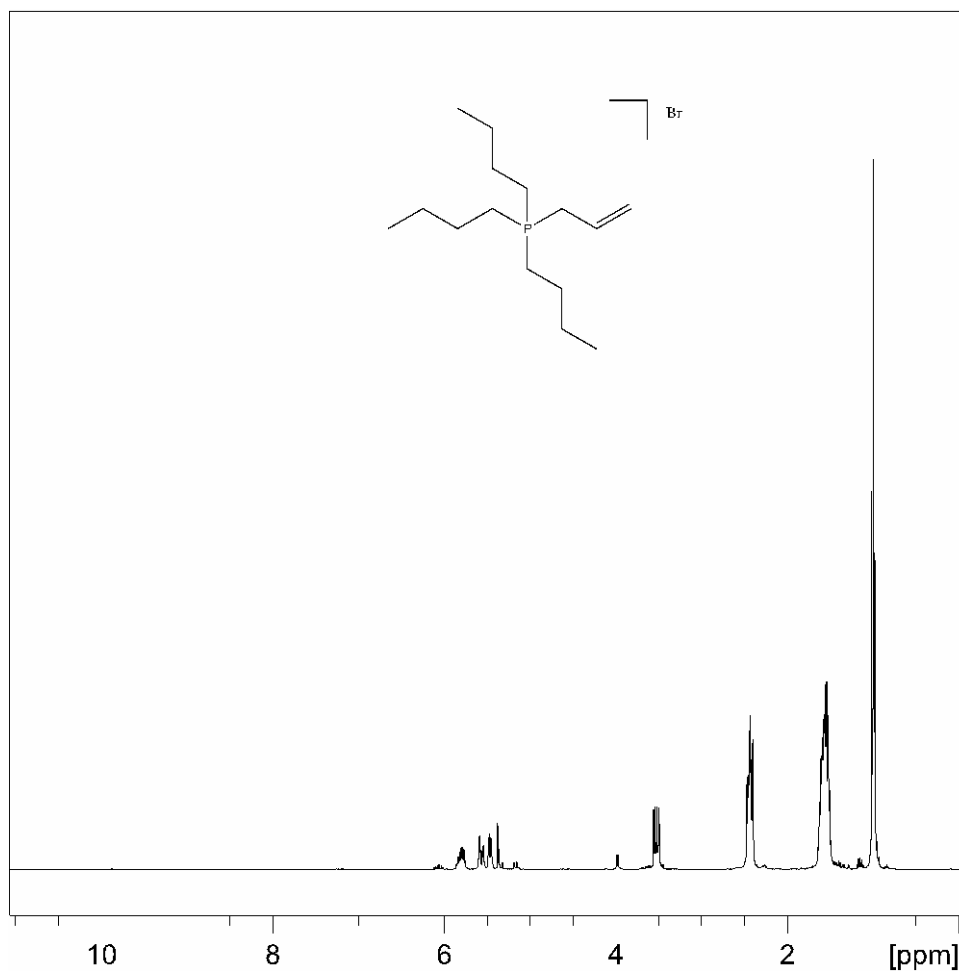

$^1\text{H-NMR}$  ( $\text{CD}_2\text{Cl}_2$ ):  $\delta$  5.79 (m, 1H,  $H_6$  of allyl), 5.51 (m, 2H,  $H_7$  of allyl), 3.52 (dd, ( $J_1 = 15.7$ ,  $J_2 = 7.5$ ), 2H,  $H_5$  of allyl), 2.43 (m, 6H,  $H_1$  of butyl), 1.56 (m, 12H,  $H_{2+3}$  of butyl), 0.99 (t, ( $J = 7.1$ ), 9H,  $H_4$  of butyl).

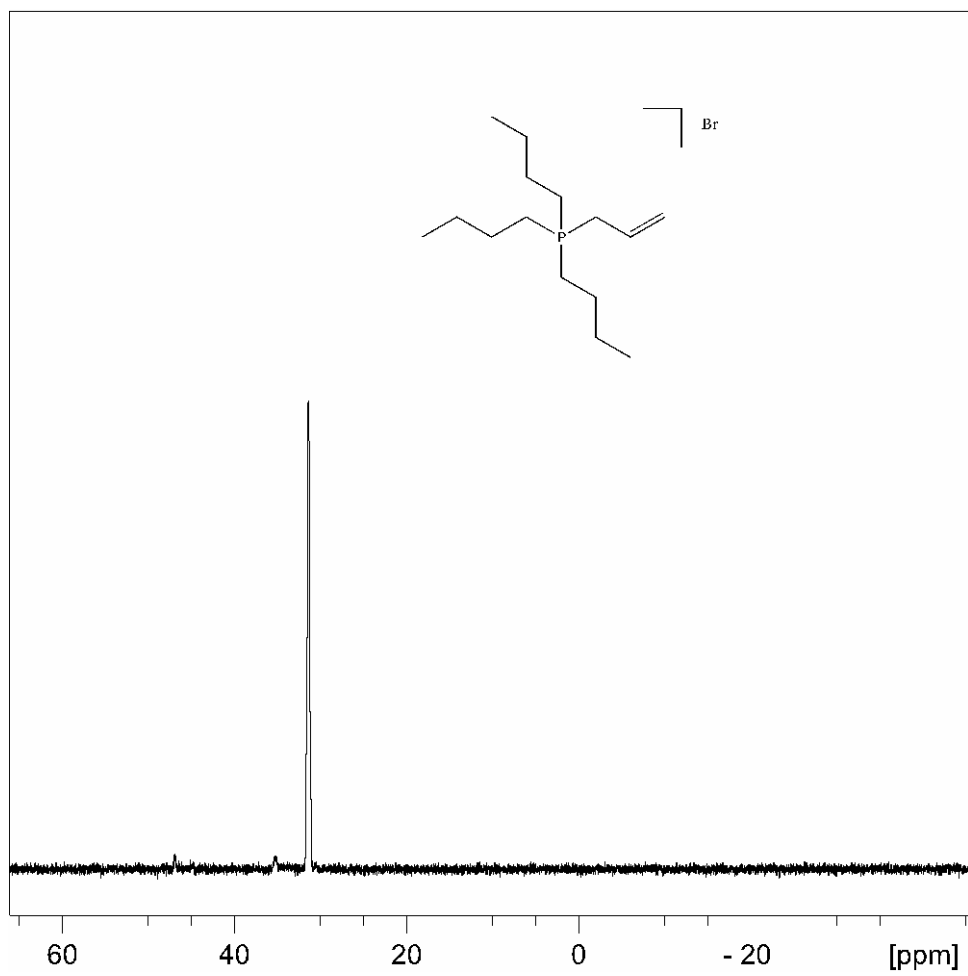

$^{31}\text{P}$ -NMR { $^1\text{H}$ } ( $\text{CD}_2\text{Cl}_2$ ):  $\delta$  31.3 (s).

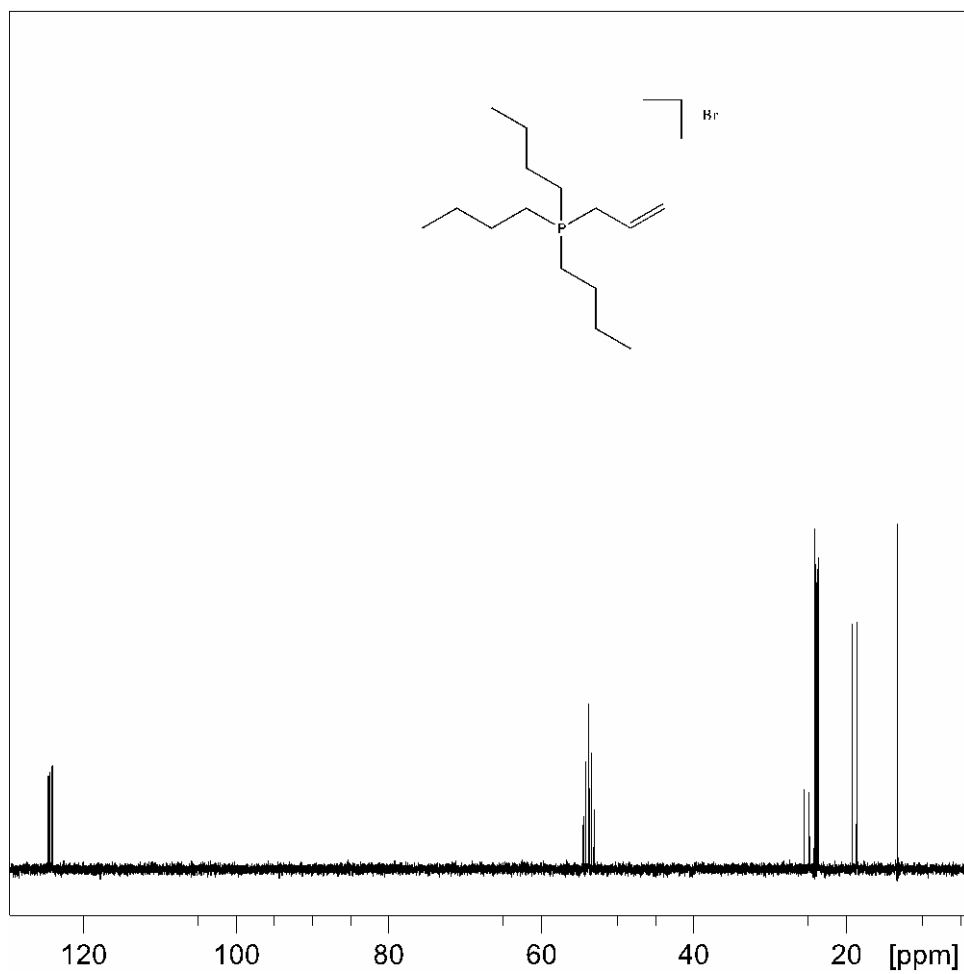

$^{13}\text{C}$ -NMR  $\{^1\text{H}\}$  ( $\text{CD}_2\text{Cl}_2$ ):  $\delta$  124.4 (d, ( $J_{\text{C,P}} = 9.8$ ),  $\text{C}_7$  of allyl), 124.0 (d, ( $J_{\text{C,P}} = 11.7$ ),  $\text{C}_6$  of allyl), 25.0 (d, ( $J_{\text{C,P}} = 46.9$ ),  $\text{C}_5$  of allyl), 23.9 (d, ( $J_{\text{C,P}} = 15.3$ ),  $\text{C}_2$  of butyl), 23.6 (d, ( $J_{\text{C,P}} = 4.7$ ),  $\text{C}_3$  of butyl), 18.8 (d, ( $J_{\text{C,P}} = 47.1$ ),  $\text{C}_1$  of butyl), 13.2 (s,  $\text{C}_4$  of butyl).

IL 2: Crotyltributylphosphonium bis(trifluoromethane)sulfonimide.

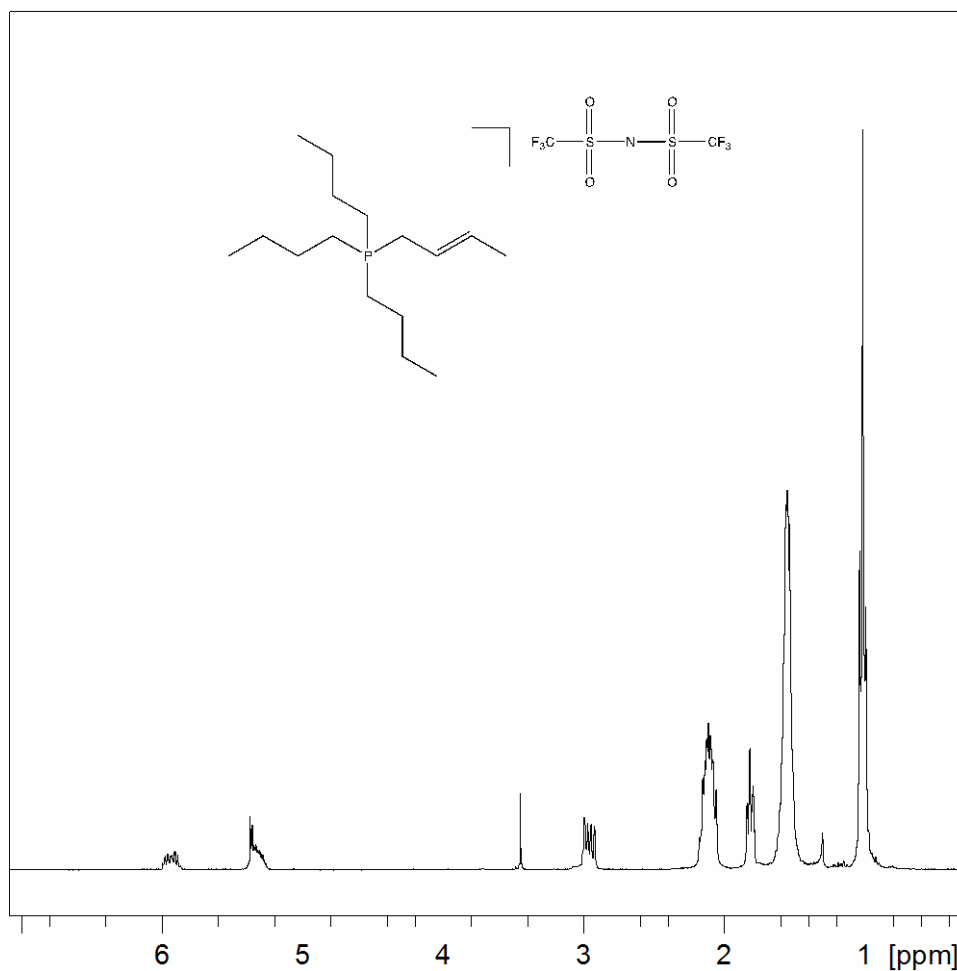

<sup>1</sup>H-NMR (CD<sub>2</sub>Cl<sub>2</sub>): δ 5.90 (m, 1H, H<sub>6</sub> of crotyl), 5.30 (m, 1H, H<sub>7</sub> of crotyl), 2.96 (dd, (J<sub>1</sub> = 14.3, J<sub>2</sub> = 7.5), 2H, H<sub>5</sub> of crotyl), 2.09 (m, 6H, H<sub>1</sub> of butyl), 1.80 (t, (J = 5.7), 3H, H<sub>8</sub> of crotyl), 1.51 (m, 12H, H<sub>2+3</sub> of butyl), 1.01 (t, (J = 7.0), 9H, H<sub>4</sub> of butyl).

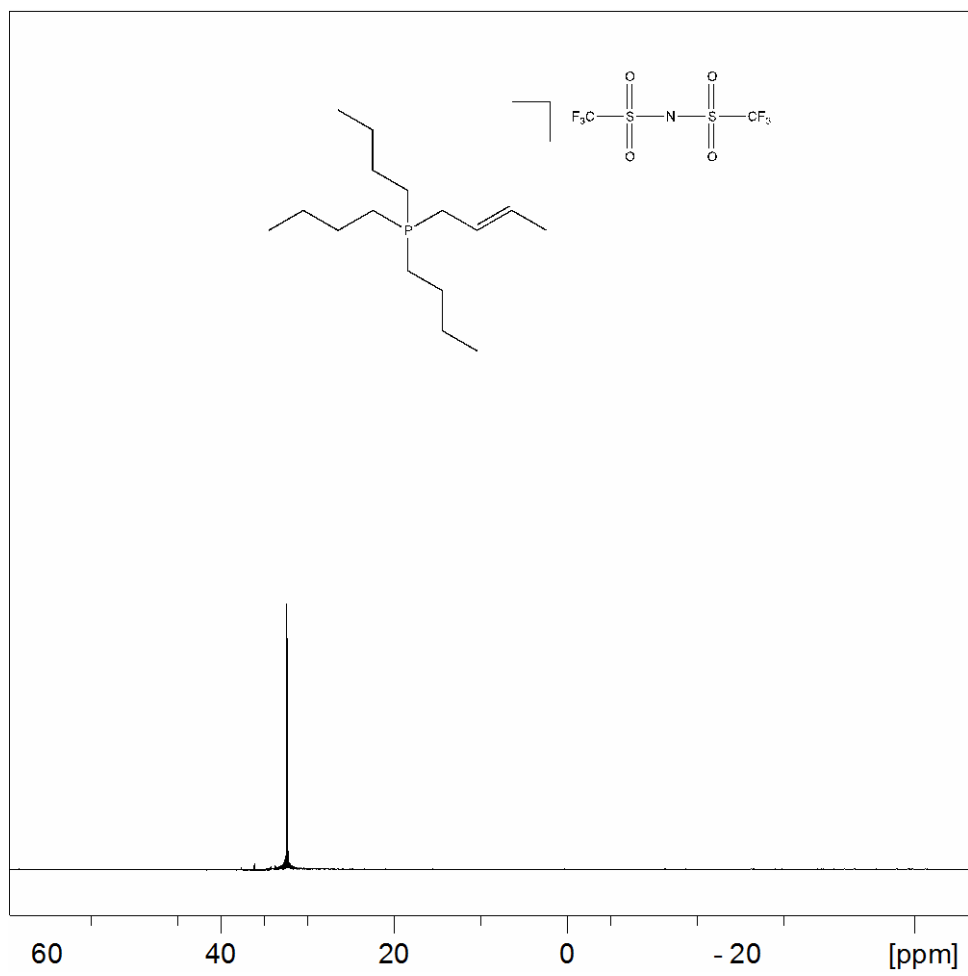

$^{31}\text{P}$ -NMR  $\{^1\text{H}\}$  ( $\text{CD}_2\text{Cl}_2$ ):  $\delta$  32.2 (s).

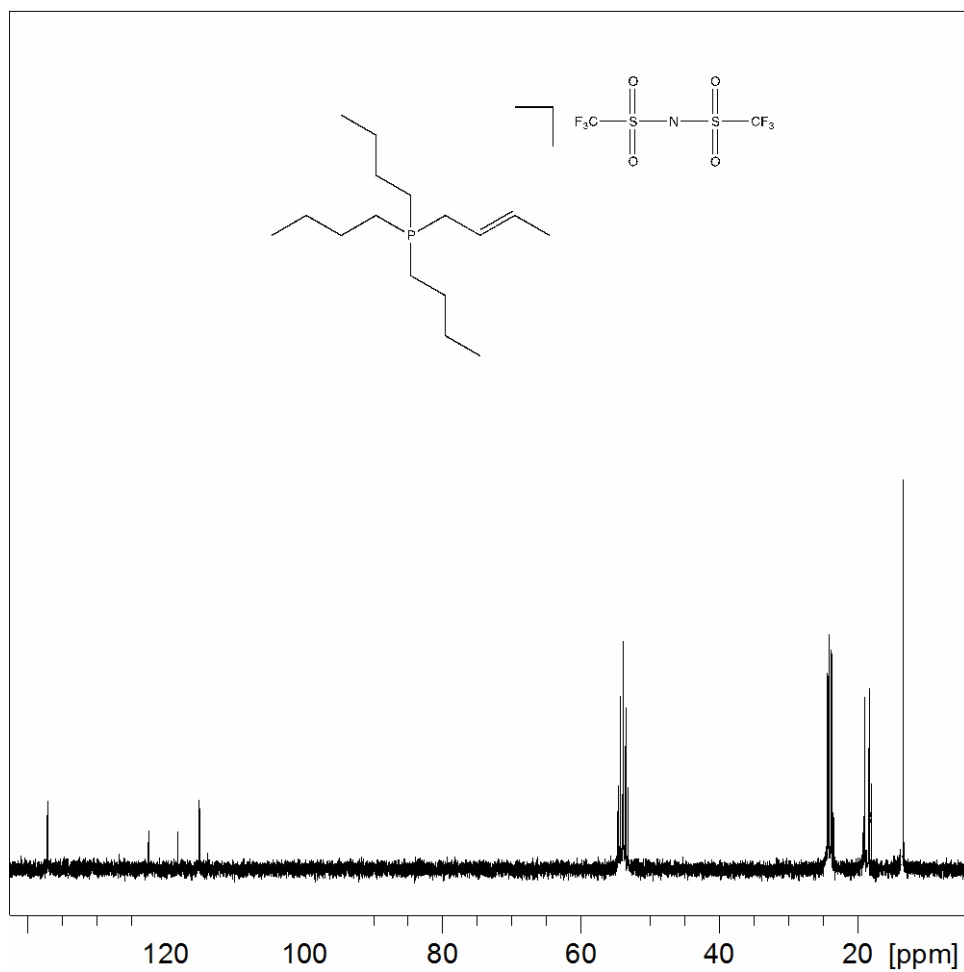

**$^{13}\text{C-NMR}$**   $\{^1\text{H}\}$  ( $\text{CD}_2\text{Cl}_2$ ):  $\delta$  137.0 (d, ( $J_{\text{C,P}} = 12.1$ ),  $\text{C}_6$  of crotyl), 120.1 (c, ( $J_{\text{C,F}} = 322.3$ ),  $\text{CF}_3$  of  $\text{NTf}_2$ ), 115.1 (d, ( $J_{\text{C,P}} = 10.7$ ),  $\text{C}_7$  of crotyl), 24.1 (d, ( $J_{\text{C,P}} = 15.3$ ),  $\text{C}_2$  of butyl), 23.8 (d, ( $J_{\text{C,P}} = 63.6$ ),  $\text{C}_5$  of crotyl), 23.7 (d, ( $J_{\text{C,P}} = 4.7$ ),  $\text{C}_3$  of butyl), 18.6 (d, ( $J_{\text{C,P}} = 47.1$ ),  $\text{C}_1$  of butyl), 18.2 (s,  $\text{C}_8$  of crotyl), 13.3 (s,  $\text{C}_4$  of butyl).

IL 3: Allyltributylphosphonium tetrakis-(3,5-bis(trifluoromethyl)phenyl)borate.

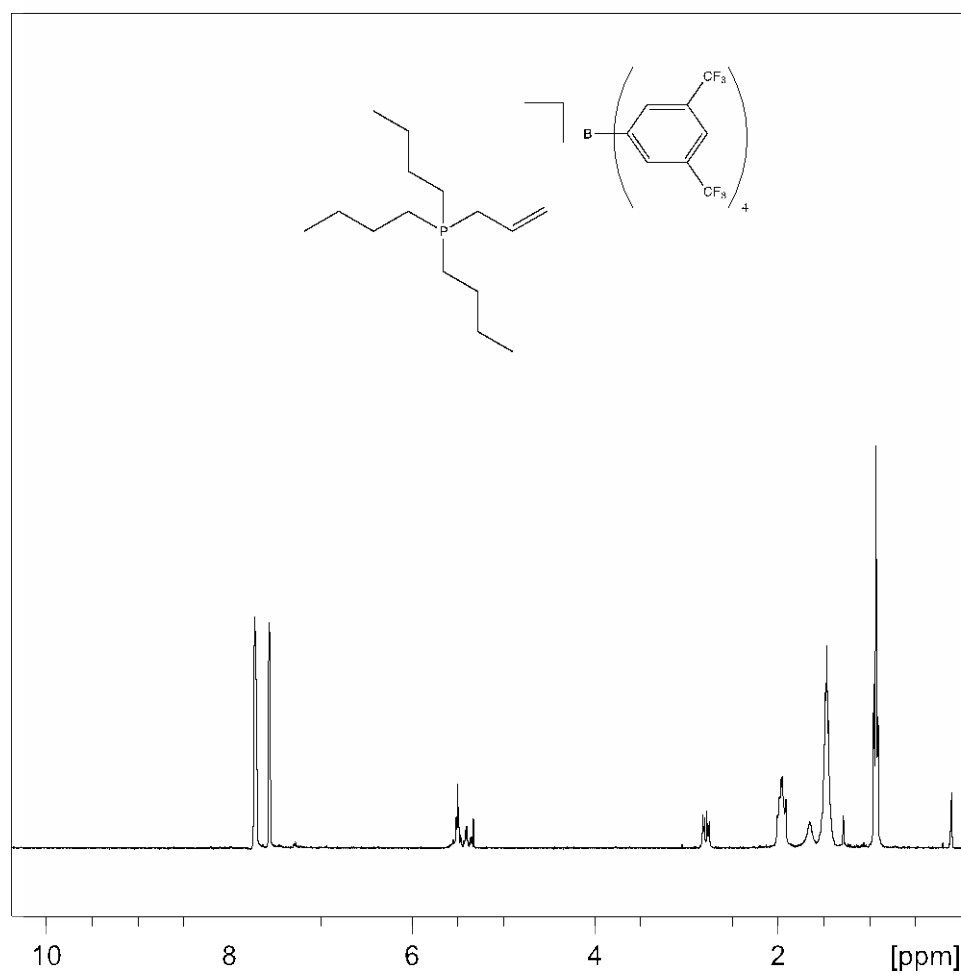

$^1\text{H-NMR}$  ( $\text{CD}_2\text{Cl}_2$ ):  $\delta$  7.71 (s, 8H,  $H_o$  of  $\text{BAr}_4'$ ), 7.56 (s, 4H,  $H_p$  of  $\text{BAr}_4'$ ), 5.43 (m, 3H,  $H_{6+7}$  of allyl), 2.78 (dd, ( $J_1 = 13.9$ ,  $J_2 = 6.2$ ), 2H,  $H_5$  of allyl), 1.96 (m, 6H,  $H_I$  of butyl), 1.46 (m, 12H,  $H_{2+3}$  of butyl), 0.92 (t, ( $J = 7.0$ ), 9H,  $H_4$  of butyl).

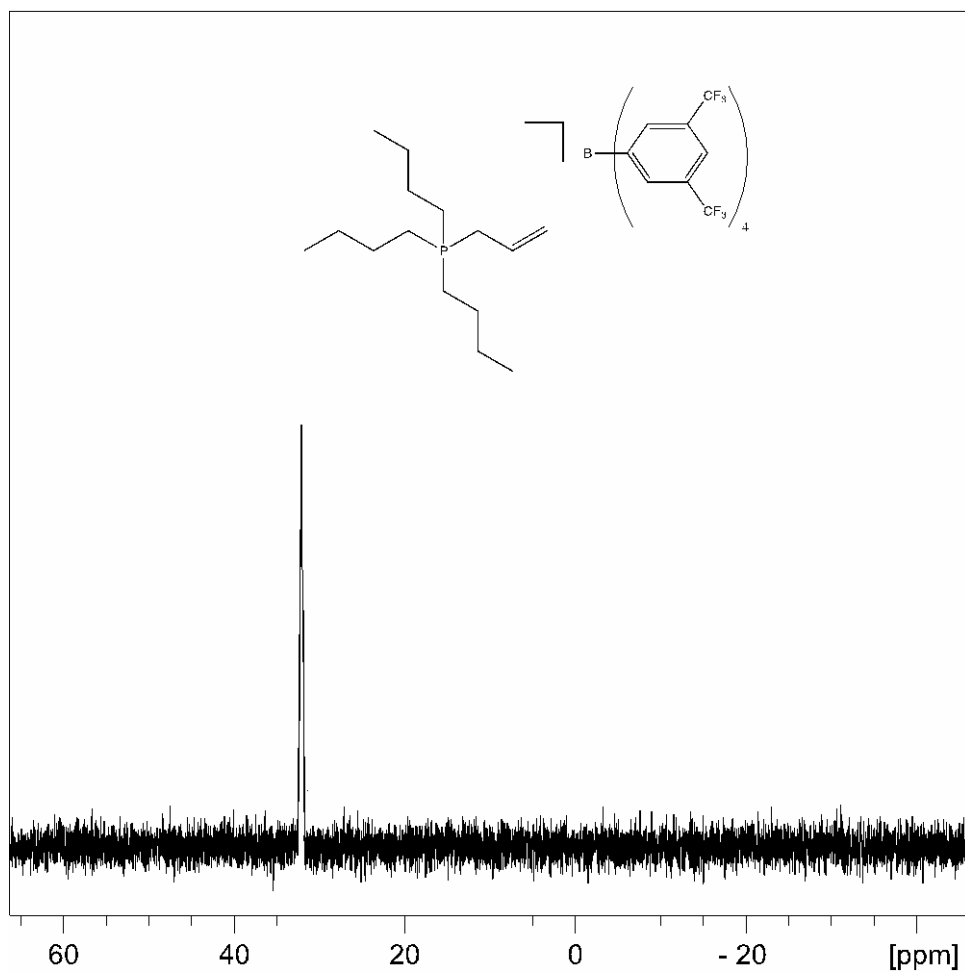

$^{31}\text{P}$ -NMR  $\{^1\text{H}\}$  ( $\text{CD}_2\text{Cl}_2$ ):  $\delta$  32.0 (s).



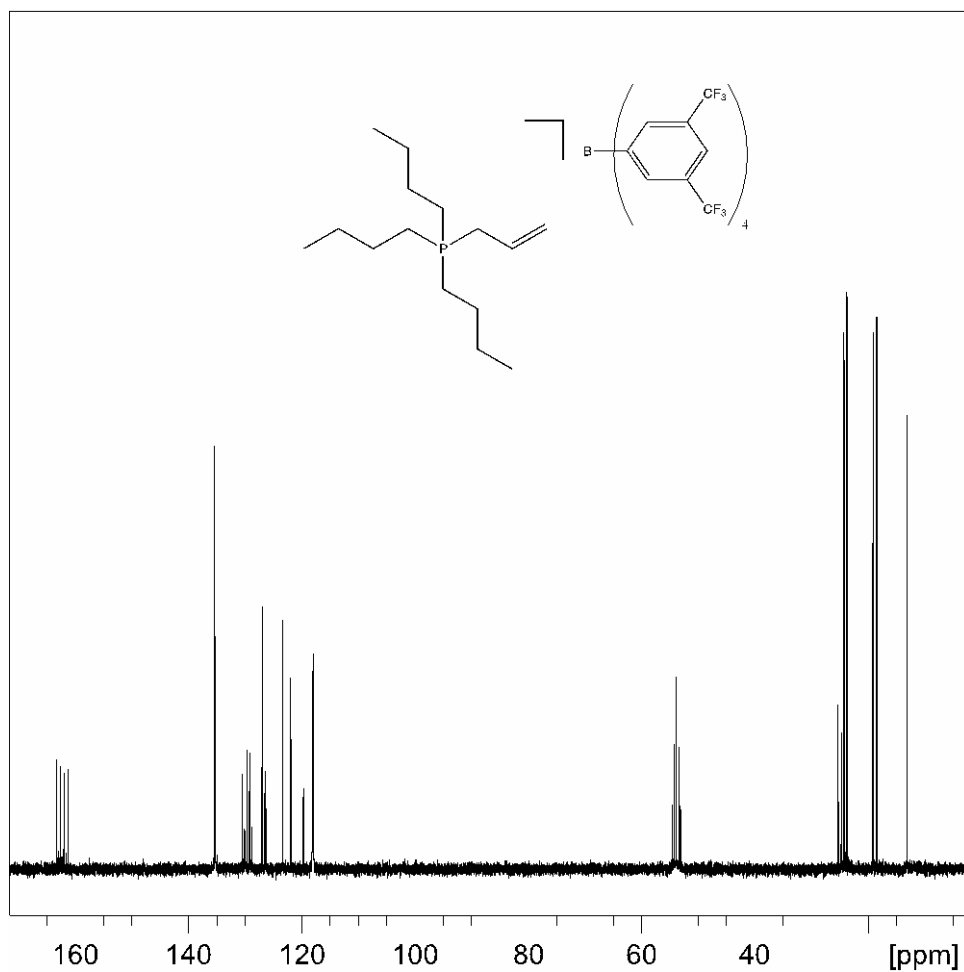

**$^{13}\text{C-NMR}$**   $\{^1\text{H}\}$  ( $\text{CD}_2\text{Cl}_2$ ):  $\delta$  162.2 (q, ( $J_{\text{C,B}} = 49.9$ ),  $C_i$  of  $\text{BAr}_4'$ ), 135.2 (s,  $C_o$  of  $\text{BAr}_4'$ ), 129.3 (q, ( $J_{\text{C,F}} = 31.6$ ),  $C_m$  of  $\text{BAr}_4'$ ), 126.3 (d, ( $J_{\text{C,P}} = 11.6$ ),  $C_6$  of allyl), 125.0 (c, ( $J_{\text{C,F}} = 272.6$ ),  $\text{CF}_3$  of  $\text{BAr}_4'$ ), 121.9 (d, ( $J_{\text{C,P}} = 9.5$ ),  $C_7$  of allyl), 119.6 (s,  $C_p$  of  $\text{BAr}_4'$ ), 24.9 (d, ( $J_{\text{C,P}} = 46.9$ ),  $C_5$  of allyl), 24.1 (d, ( $J_{\text{C,P}} = 15.2$ ),  $C_2$  of butyl), 23.6 (d, ( $J_{\text{C,P}} = 4.9$ ),  $C_3$  of butyl), 18.7 (d, ( $J_{\text{C,P}} = 47.5$ ),  $C_1$  of butyl), 13.0 (s,  $C_4$  of butyl).

Precursor of IL 4: Diallyldiphenylphosphonium bromide.

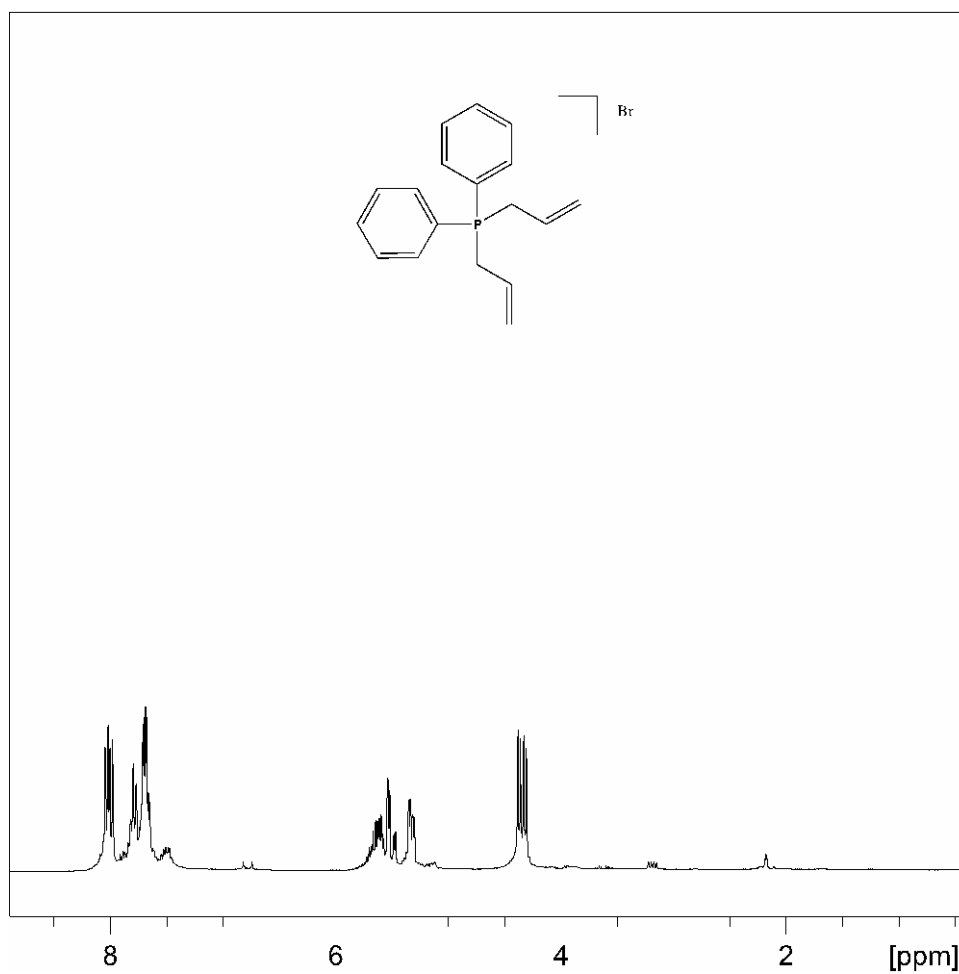

<sup>1</sup>H-NMR (CD<sub>2</sub>Cl<sub>2</sub>): δ 7.72 (m, 10H, *H* of phenyl), 5.50 (m, 6H, *H*<sub>6+7</sub> of allyl), 4.34 (dd, (*J*<sub>1</sub> = 15.7, *J*<sub>2</sub> = 6.9), 4H, *H*<sub>5</sub> of allyl).

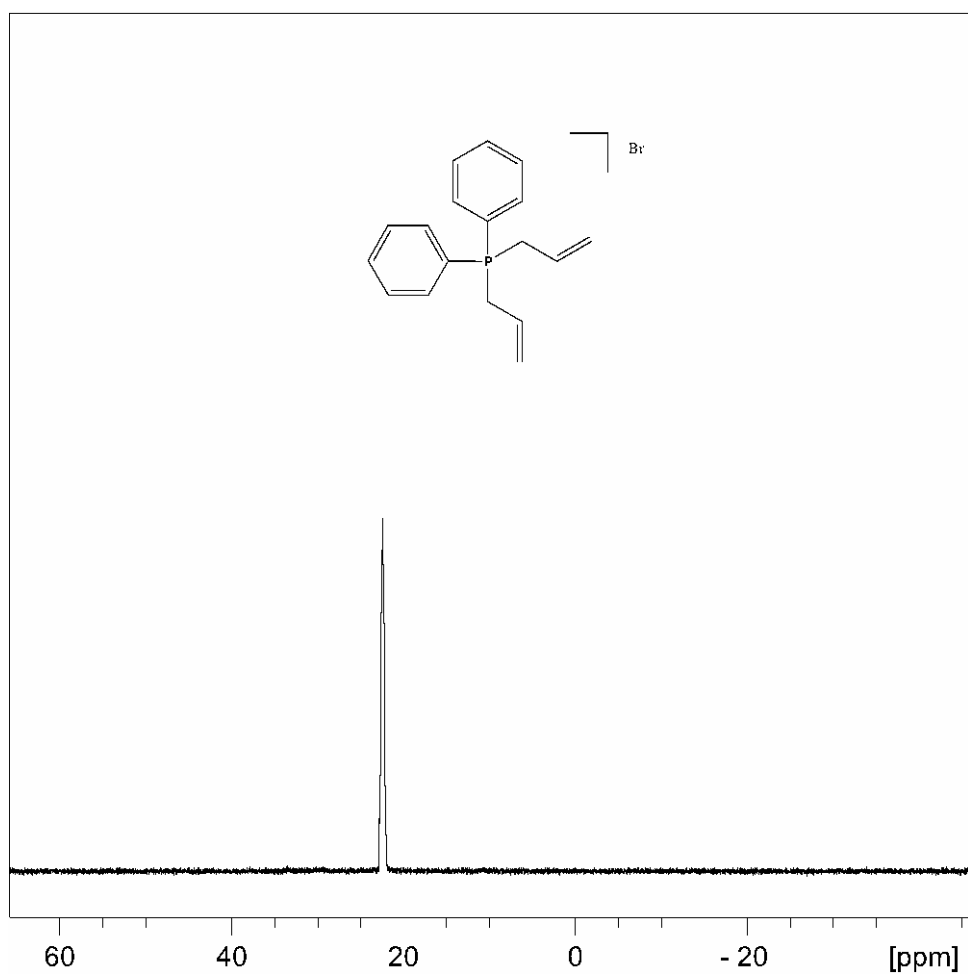

$^{31}\text{P}$ -NMR  $\{^1\text{H}\}$  ( $\text{CD}_2\text{Cl}_2$ ):  $\delta$  22.3 (s).

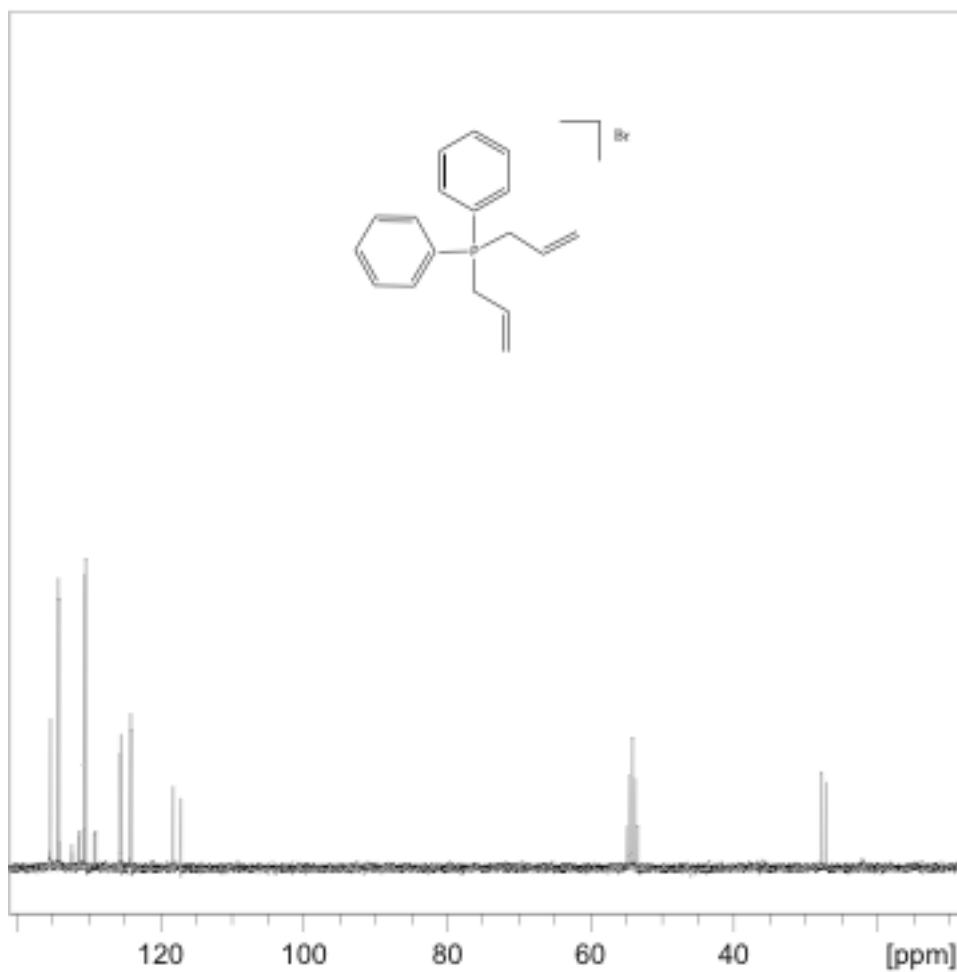

$^{13}\text{C-NMR}$   $\{^1\text{H}\}$  ( $\text{CD}_2\text{Cl}_2$ ):  $\delta$  135.2 (d, ( $J_{\text{C,P}} = 3.0$ ),  $C_4$  of phenyl), 134.1 (d, ( $J_{\text{C,P}} = 9.4$ ),  $C_3$  of phenyl), 130.4 (d, ( $J_{\text{C,P}} = 12.2$ ),  $C_2$  of phenyl), 125.4 (d, ( $J_{\text{C,P}} = 12.9$ ),  $C_6$  of allyl), 124.0 (d, ( $J_{\text{C,P}} = 9.7$ ),  $C_7$  of allyl), 117.6 (d, ( $J_{\text{C,P}} = 82.4$ ),  $C_1$  of phenyl), 27.5 (d, ( $J_{\text{C,P}} = 49.1$ ),  $C_5$  of allyl).

IL 4: Diallyldiphenylphosphonium bis(trifluoromethane)sulfonimide.

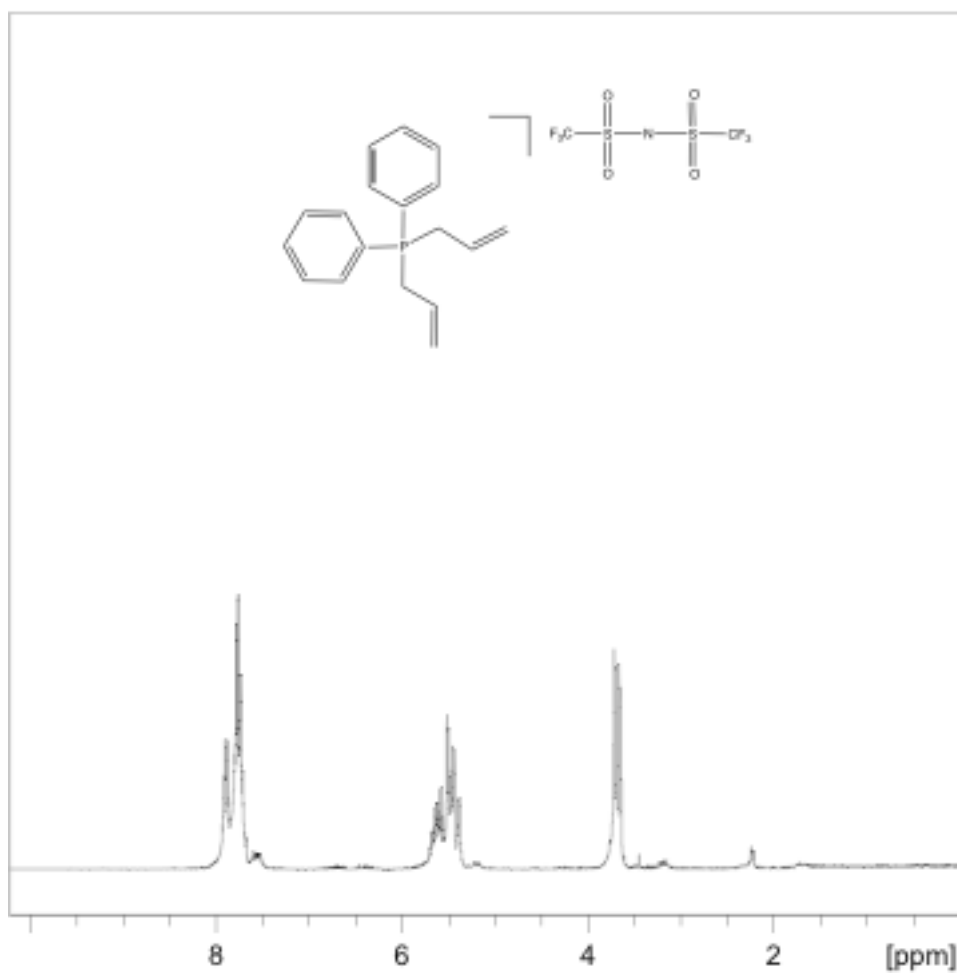

$^1\text{H-NMR}$  ( $\text{CD}_2\text{Cl}_2$ ):  $\delta$  7.82 (m, 10H,  $H$  of phenyl), 5.52 (m, 6H,  $H_{6+7}$  of allyl), 3.67 (dd, ( $J_1 = 15.0$ ,  $J_2 = 7.0$ ), 4H,  $H_5$  of allyl).

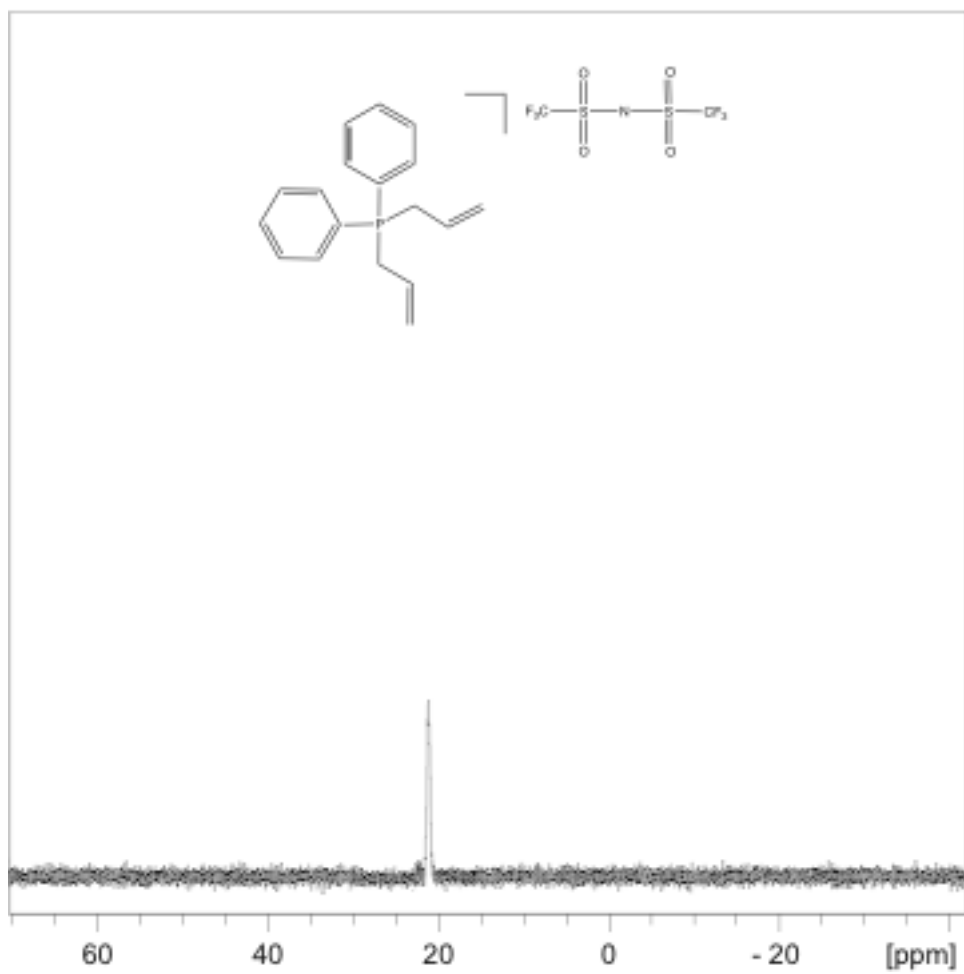

$^{31}\text{P}$ -NMR  $\{^1\text{H}\}$  ( $\text{CD}_2\text{Cl}_2$ ):  $\delta$  21.1 (s).

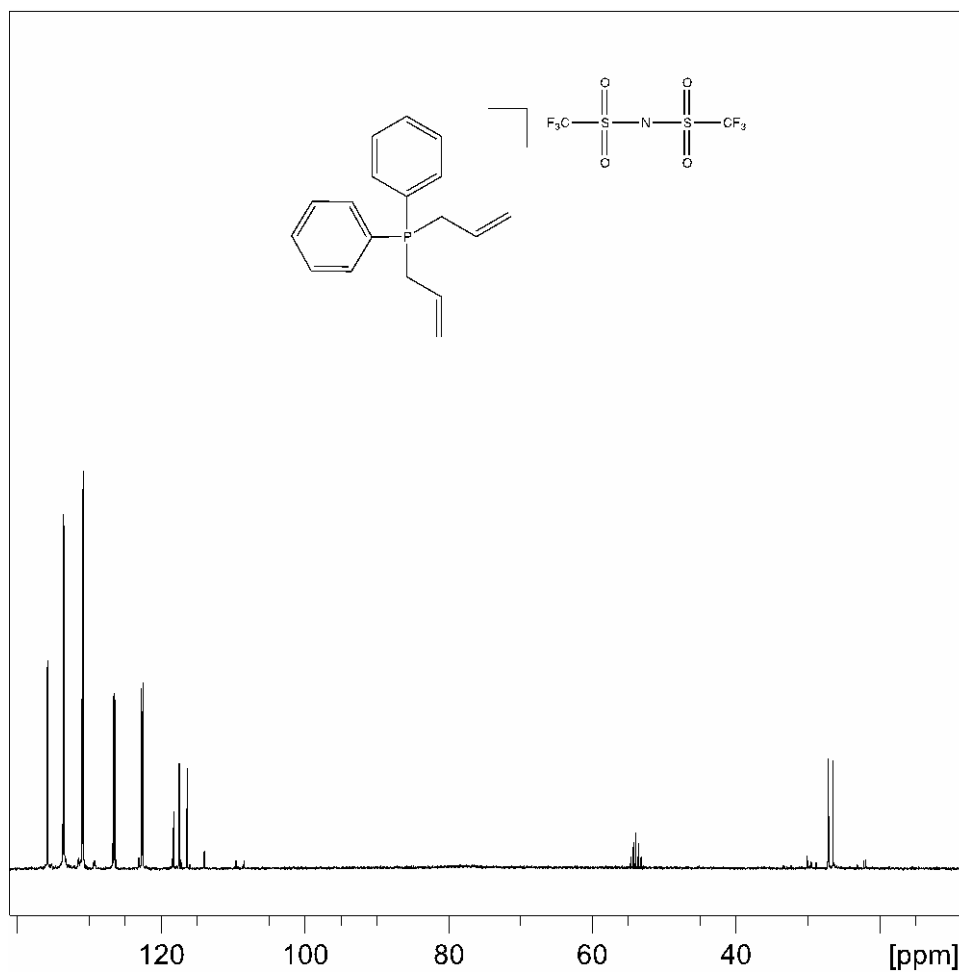

$^{13}\text{C}$ -NMR  $\{^1\text{H}\}$  ( $\text{CD}_2\text{Cl}_2$ ):  $\delta$  135.7 (d, ( $J_{\text{C,P}} = 3.0$ ),  $\text{C}_4$  of phenyl), 133.4 (d, ( $J_{\text{C,P}} = 9.0$ ),  $\text{C}_3$  of phenyl), 130.8 (d, ( $J_{\text{C,P}} = 12.4$ ),  $\text{C}_2$  of phenyl), 126.4 (d, ( $J_{\text{C,P}} = 12.8$ ),  $\text{C}_6$  of allyl), 122.5 (d, ( $J_{\text{C,P}} = 9.6$ ),  $\text{C}_7$  of allyl), 120.3 (c, ( $J_{\text{C,F}} = 321.6$ ),  $\text{CF}_3$  of  $\text{NTf}_2$ ), 116.8 (d, ( $J_{\text{C,P}} = 83.0$ ),  $\text{C}_1$  of phenyl), 26.8 (d, ( $J_{\text{C,P}} = 50.3$ ),  $\text{C}_5$  of allyl).

### HRMS data of phosphonium salts.

IL1: Allyltributylphosphonium bromide.

HRMS (ESI<sup>+</sup>, *m/z*) calcd for (C<sub>15</sub>H<sub>32</sub>P)<sup>+</sup> (M<sup>+</sup>): 243.2237, found: 243.2223; MS (ESI, *m/z*): 79 [<sup>79</sup>Br<sup>-</sup>, 100%], 81 [<sup>81</sup>Br<sup>-</sup>, 95%].

IL 2: Crotyltributylphosphonium bis(trifluoromethane)sulfonimide.

HRMS (ESI<sup>+</sup>, *m/z*) calcd for (C<sub>16</sub>H<sub>34</sub>P)<sup>+</sup> (M<sup>+</sup>): 257.2393, found: 257.2374; HRMS (ESI, *m/z*) calcd for (C<sub>2</sub>F<sub>6</sub>NO<sub>4</sub>S<sub>2</sub>)<sup>-</sup> (NTf<sub>2</sub><sup>-</sup>): 279.9178, found 279.9191.

IL3: Allyltributylphosphonium tetrakis-[3,5-bis(trifluoromethyl)phenyl]borate.

HRMS (ESI<sup>+</sup>, *m/z*) calcd for (C<sub>15</sub>H<sub>32</sub>P)<sup>+</sup> (M<sup>+</sup>): 243.2237, found: 243.2228; HRMS (ESI, *m/z*) calcd for (C<sub>32</sub>H<sub>12</sub>BF<sub>24</sub>)<sup>-</sup> (BAr'<sub>4</sub>)<sup>-</sup>: 863.0654, found 863.0650.

Precursor of IL 4: Diallyldiphenylphosphonium bromide.

HRMS (ESI<sup>+</sup>, *m/z*) calcd for (C<sub>18</sub>H<sub>20</sub>P)<sup>+</sup> (M<sup>+</sup>): 267.1298, found: 267.1308; MS (ESI, *m/z*): 79 [<sup>79</sup>Br<sup>-</sup>, 100%], 81 [<sup>81</sup>Br<sup>-</sup>, 95%].

IL 4: Diallyldiphenylphosphonium bis(trifluoromethane)sulfonimide.

HRMS (ESI<sup>+</sup>, *m/z*) calcd for (C<sub>18</sub>H<sub>20</sub>P)<sup>+</sup> (M<sup>+</sup>): 267.1298, found: 267.1292; HRMS (ESI, *m/z*) calcd for (C<sub>2</sub>F<sub>6</sub>NO<sub>4</sub>S<sub>2</sub>)<sup>-</sup> (NTf<sub>2</sub><sup>-</sup>): 279.9178, found 279.9182.



## References.

1. J. McNulty, P. Das, *Tetrahedron Lett.* 50 (2009) 5737–5740.
2. M. Brookhart, B. Grant, A. F. Volpe Jr., *Organometallics*, 11, (1992) 3920-3922.
3. J.P. Van Hook, A. V. Tobolsky, *J. Am. Chem. Soc.* 80 (1985) 779–782.
4. J. L. Anderson, D. W. Armstrong, *Anal. Chem.* 77 (2005) 6453–6462.
